# Supplementary material for: Islands of retroelements are major components of Drosophila centromeres
Source: PLoS Biol. 2019 May 14;17(5):e3000241. doi: 10.1371/journal.pbio.3000241 (PMC6516634; doi:10.1371/journal.pbio.3000241)
Supplement: S16 Table — We assigned contigs from the assembly to a chromosome and a chromatin status (heterochromatin/euchromatin, etc., based on [115, 116]; see Materials and methods). Blank cells indicate that a region could not be assigned. (XLSX) [file pbio.3000241.s037.xlsx]

## Sheet: S16_Table
S16 Table. Chromatin status assignments for contigs.
#chromosome	#hetero/euchromatin	#region	#contig_name	#range	#length
2	het	telomere	2L_1	0-35000	21497588
2	eu		2L_1	35000-21497588	21497588
2	eu		2L_2	0-1561069	2041562
2	het		2L_2	1561069-2041562	2041562
2	het		2R_16		784897
2	het		2R_18		724820
2	het		2R_19		416897
2	het		2R_20		1966542
2	het		2R_21	0-1656950	21691270
2	eu		2R_21	1656950-21579400	21691270
2	het	telomere	2R_21	21579400-21691270	21691270
2	het		2R2_56_D1828		13164
3	het	proximal_centromeric region	3Cen_27_D1777		11973
3	het		3Cen_31_D1643_D1653_D1791_1		30458
3	het		3Cen_31_D1643_D1653_D1791_5		2876
3	het		3Cen_31_D1643_D1653_D1791_6		23938
3	het		3Cen_31_D1643_D1653_D1791_8		71438
3	het	proximal_centromeric region	3Cen_36_D1605_1		27124
3	het	proximal_centromeric region	3Cen_36_D1605_2		9663
3	het	proximal_centromeric region	3Cen_50_D1686_1		5642
3	het	proximal_centromeric region	3Cen_50_D1686_2		14583
3	het	telomere	3L_1	0-7000	24600008
3	eu		3L_1	7000-22946425	24600008
3	het		3L_1	22946425-24600008	24600008
3	het		3L_10		1333836
3	het		3L_3		106275
3	het		3L_4		1804980
3	het		3L_5		545545
3	het		3L_8		9398
3	het	proximal_centromeric region	3R_1		27264
3	het	proximal_centromeric region	3R_10		36246
3	het	proximal_centromeric region	3R_2		3452
3	eu		3R_28	0-27961000	27994903
3	het	telomere	3R_28	27961000-27994903	27994903
3	het	proximal_centromeric region	3R_3		13549
3	het	proximal_centromeric region	3R_4		2314
3	het	centromere	3R_5		103827
3	het	proximal_centromeric region	3R_6		45849
3	het	proximal_centromeric region	3R_8		16639
3	het	proximal_centromeric region	3R_9		79293
3	het		3_scaffold1		2808589
3	het		3_scaffold2		1735083
4	het		4_2	0-50000	1317735
4	eu		4_2	50000-1317735	1317735
3	het		Contig101		50038
X	het	proximal_centromeric region	Contig102		4967
X	het	proximal_centromeric region	Contig103		7153
3	het	proximal_centromeric region	Contig11		338657
	het		Contig111		50623
	het		Contig112		52470
	het		Contig114		89724
	het		Contig117		40889
	het		Contig118		38442
4	het	centromere	Contig119		93914
X	het	proximal_centromeric region	Contig120		98825
	het		Contig121		50340
	het		Contig123		40807
	het		Contig128		38311
	het	telomere	Contig129		34040
	het	telomere	Contig13		268964
	het		Contig133		25747
	het		Contig134		37526
X	het		Contig135		439355
2	het	proximal_centromeric region	Contig142	0-60000	183015
2	het	proximal_centromeric region	Contig142	60000-183015	183015
3	het	proximal_centromeric region	Contig145		99622
	het		Contig147		93105
	het		Contig149		98868
	het		Contig150		113509
	het		Contig151		47769
	het		Contig157		21176
	het		Contig21		200908
X	het	proximal_centromeric region	Contig31		27958
	het		Contig36		133201
	het		Contig37		41805
	het		Contig38		224834
	het		Contig39		95124
	het		Contig41		33639
	het		Contig42		52851
	het		Contig43		38154
	het		Contig45		55038
	het		Contig46		72052
	het		Contig47		52399
	het		Contig49		42125
X	het		Contig5		535166
	het		Contig50		90319
	het		Contig51		43300
	het		Contig53		52039
	het		Contig54		51347
	het		Contig55		72375
	het		Contig56		39431
	het		Contig57		65984
	het		Contig58		35216
	het		Contig59		64516
	het		Contig61		40591
	het		Contig62		61736
	het		Contig63		34725
	het		Contig64		40641
	het		Contig66		46486
	het		Contig69		37816
	het		Contig72		48072
X	het	centromere	Contig79		70181
3	het		Contig80		13218
	het	telomere	Contig82		232305
X	het	proximal_centromeric region	Contig83		15769
3	het	proximal_centromeric region	Contig86		30087
	het		Contig87		13052
3	het		Contig9		393235
	het		Contig90		32831
	het		Contig92		25251
	het		Contig93		19945
3	het		Contig94		12855
X	het	proximal_centromeric region	Contig95		17404
X	het	proximal_centromeric region	Contig96		19727
3	het		Contig98		7989
	het		Contig99		21056
			dmel_mitochondrion_genome		19532
2	het	proximal_centromeric region	Rsp_2		25308
X	het	telomere	X_1	0-123800	21906113
X	eu		X_1	123800-21906113	21906113
X	het		X_10		115839
X	eu		X_2		353202
X	eu		X_3		20518
X	het		X3X4_6_D1712_2		67988
X	eu		X_7	0-340031	733110
X	het		X_7	340031-733110	733110
X	het		X_9		35571
Y	het		Y_Contig10		396096
Y	het		Y_Contig100		6306
Y	het		Y_Contig104		415375
Y	het		Y_Contig106		59005
Y	het		Y_Contig108		42663
Y	het		Y_Contig109		38313
Y	het		Y_Contig113		50367
Y	het		Y_Contig122		59453
Y	het		Y_Contig124		71252
Y	het		Y_Contig125		33888
Y	het		Y_Contig126		56127
Y	het		Y_Contig127		60823
Y	het		Y_Contig130		70942
Y	het		Y_Contig132		23371
Y	het		Y_Contig14		239311
Y	het		Y_Contig140		716467
Y	het		Y_Contig141		190784
Y	het		Y_Contig143		83747
Y	het		Y_Contig17		416887
Y	het	proximal_centromeric region	Y_Contig2		1011280
Y	het		Y_Contig20		338369
Y	het		Y_Contig22		157794
Y	het		Y_Contig23		189747
Y	het	centromere	Y_Contig26		139957
Y	het		Y_Contig28		157911
Y	het		Y_Contig29		123550
Y	het		Y_Contig32		50581
Y	het		Y_Contig33		260816
Y	het		Y_Contig34		93265
Y	het		Y_Contig35		186386
Y	het		Y_Contig4		644356
Y	het		Y_Contig40		37260
Y	het		Y_Contig44		35218
Y	het		Y_Contig48		48393
Y	het		Y_Contig52		39424
Y	het		Y_Contig6		458350
Y	het		Y_Contig65		52166
Y	het		Y_Contig68		18332
Y	het		Y_Contig70		28820
Y	het		Y_Contig71		18047
Y	het		Y_Contig73		58927
Y	het		Y_Contig74		92656
Y	het		Y_Contig75		62633
Y	het		Y_Contig77		107302
Y	het		Y_Contig78		74813
Y	het		Y_Contig81		32099
Y	het		Y_Contig88		41475
Y	het		Y_Contig89		25792
Y	het		Y_Contig91		37888
Y	het		Y_Contig97		34309
Y	het		Y_scaffold3		235319
Y	het		Y_scaffold4		3349330
Y	het		Y_scaffold5		686231
Y	het		Y_scaffold6		574027
Y	het		Y_scaffold7		2069423
3	het	proximal_centromeric region	id=102159_0		20774
X	het		id=104983_0		24728
X	het		id=130011_0		16412
	het		id=134134_0		16339
	het		id=134699_0		14118
	het		id13735		20650
	het		id13809		20650
3	het	proximal_centromeric region	id=139401_0		11405
	het		id=142686_0		19566
	het		id=154173_0		6590
	het		id=51911_0		22343
	het		id5721		21076
3	het	proximal_centromeric region	id=67822_0		14294
3	het	proximal_centromeric region	tig00000039		42086
	het		tig00002536		17216
	het		tig00002845		33385
3	het	proximal_centromeric region	tig00022795		30745
	het		tig00051078		8880
2	het	centromere	tig00057289		24561
